# Supplementary material for: Using Risk Group Profiles as a Lightweight Qualitative Approach for Intervention Development: An Example of Prevention of Tick Bites and Lyme Disease
Source: PubMed Central journal article supplement (PMC3841373; doi:10.2196/resprot.2760), 2013-10-30
Supplement: resprot_v2i2e45_app1.pdf [file resprot_v2i2e45_app1.pdf]

## Appendix A

### Interview Guide for Outdoor people

#### Start of the interview

Each interview started with a short introduction. Interviewees were asked for permission to audiotape the interview.

#### **Demographics**

- 1 Gender
- 2 Age
- 3 Nationality
- 4 Do you speak/understand the Dutch language?
- 5 Family situation
- 6 Profession
- 7 Education

#### **Knowledge of ticks and Lyme Disease**

- 8 Do you know what a tick is?
- 9 Do you know what Lyme Disease is?
- 10 How do you get Lyme Disease?
- 11 Does a tick bite always lead to Lyme Disease?
- 12 How fast should you remove a tick?
- 13 How do you know you have Lyme Disease?
- 14 Where in nature can you get a tick bite?

#### **Experience with tick bites and Lyme Disease**

- 15 Have you ever seen a tick?
- 16 Where did you first hear on ticks and Lyme Disease?
- 17 Have you ever been bitten by a tick?
- 18 What barriers do you expect when searching for information on tick bites and Lyme Disease?
- 19 Who do you expect to inform you on tick bites and Lyme Disease?
- 20 What do you think about the current information on tick bites and Lyme Disease?
- 21 What do you want to know in order to handle tick bites better?
- 22 How do you feel about the following organizations who can inform you on tick bites and Lyme Disease? Are these the correct organizations?

- The regional Municipal Health Service
- The National Institute for Public Health and the Environment
- The municipality
- Intermediaries (sport clubs, outdoor clubs)

- General Practitioner
- National Lyme organization

**Perception and behavior regarding preventive measures**

- 23 How do you prevent yourself from getting a tick bite?
- 24 What would you do in case of a tick bite?
- 25 How severe do you perceive Lyme Disease?
- 26 What problems do you expect when getting a tick bite or treating a tick bite?

### **Frequency of visits to high-risk areas**

- 27 How often do you visit:
- Your backyard or other people's backyard
  - Forrest
  - Heath land
  - Dunes
  - City parks

### **Attitude towards checking yourself for tick bites**

- 28 Do you ever check yourself for tick bites? When?
- 29 How do you feel about the following preventive measures against tick bites:
- Stay on the paths in forests or parks
  - Wearing long pants, putting you pant legs in your soks, wearing closed shoes
  - Using insect repellent for uncovered skin
  - Using DEET on your clothes

### **Knowlegde and use of mobile technology**

- 30 Do you easily adopt new technologies?
- 31 Do you like to use new technologies, like internet and mobile phones?
- 32 Do you know what a smartphone is?
- 33 Do you own a smartphone?
- 34 Do you know what to do with a QR code?

### **Tick and Lyme Disease related information seeking behavior**

- 35 How would the ideal website on tick bites and Lyme Disease look like?
- 36 How would the ideal smartphone application on tick bites and Lyme Disease look like?
- 37 Do you feel comfortable getting information on tick bites and Lyme Disease from a website?
- 38 Would you use this website and why?
- 39 Do you feel comfortable getting information on tick bites and Lyme Disease for a mobile application?
- 40 Would you install this mobile application on your smartphone?
- 41 What other ways do you suggest to get more information on tick bites and Lyme Disease?

### **End of the interview**

- 42 Do you have any questions?

## Interview Guide for Parents

### Start of the interview

Each interview started with a short introduction. Interviewees were asked for permission to audiotape the interview.

### Demographics

- 1 Gender
- 2 Age
- 3 Nationality
- 4 Do you speak/understand the Dutch language?
- 5 Family situation
- 6 How old are your children?
- 6 Profession
- 7 Education

### Knowledge of ticks and Lyme Disease

- 8 Do you know what a tick is?
- 9 Do you know what Lyme Disease is?
- 10 How do you get Lyme Disease?
- 11 Does a tick bite always lead to Lyme Disease?
- 12 How fast should you remove a tick?
- 13 How do you know you have Lyme Disease?
- 14 Where in nature can a child get a tick bite?

### Experiences with tick bites and Lyme Disease

- 15 Have you ever seen a tick?
- 16 Where did you first hear on ticks and Lyme Disease?
- 17 Has one of your children ever been bitten by a tick?
- 18 What barriers do you expect when searching for information on tick bites and Lyme Disease?
- 19 Who do you expect to inform you on tick bites and Lyme Disease? Why?
- 20 What do you think about the current information on tick bites and Lyme Disease?
- 21 What do you want to know in order to handle tick bites better?
- 22 How do you feel about the following organizations who can inform you on tick bites and Lyme Disease? Are these the correct organizations?

- The regional Municipal Health Service
- The National Institute for Public Health and the Environment
- The municipality
- Intermediaries (sport clubs, outdoor clubs)
- General Practitioner

- National Lyme organization

**Perception and behavior regarding preventive measures**

- 23 How do you prevent your children from getting a tick bite?
- 24 What would you do in case of a tick bite?
- 25 How severe do you perceive Lyme Disease?
- 26 What problems do you expect when getting a tick bite or treating a tick bite?

### **Frequency of visits to high-risk areas**

- 27 How often do your children visit:
- Your backyard or other people's backyard
  - Forrest
  - Heath land
  - Dunes
  - City parks
- 28 Do you children attend camps or school trips at/to the forest?  
If yes, do you think it is important your children will be checked for tick bites?  
Who should be responsible for this?

### **Attitude towards checking your child for tick bites**

- 29 Do you ever check your children for tick bites? When?
- 30 How do you feel about the following preventive measures against tick bites:
- Stay on the paths in forests or parks
  - Wearing long pants, putting you pant legs in your soks, wearing closed shoes
  - Using insect repellent for uncovered skin
  - Using DEET on your children's clothes
  - Let your child wear a cap

### **Knowlegde and use of mobile technology**

- 31 Do you easily adopt new technologies?
- 32 Do you like to use new technologies, like internet and mobile phones?
- 33 Do you know what a smartphone is?
- 34 Do you own a smartphone?
- 35 Do you know what to do with a QR code?

### **Tick and Lyme Disease related information seeking behavior**

- 36 How would the ideal website on tick bites and Lyme Disease look like?
- 37 How would the ideal smartphone application on tick bites and Lyme Disease look like?
- 38 Do you feel comfortable getting information on tick bites and Lyme Disease from a website?
- 39 Would you use this website and why?
- 40 Do you feel comfortable getting information on tick bites and Lyme Disease for a mobile application?
- 41 Would you install this mobile application on your smartphone?
- 42 What other ways do you suggest to get more information on tick bites and Lyme Disease?

### **End of the interview**

43 Do you have any questions?
